# Supplementary material
Source: PubMed Central journal article supplement (PMC4838906)
Supplement: NIHMS764048-supplement-Supplemental_Data.pdf [file NIHMS764048-supplement-Supplemental_Data.pdf]

## **SUPPLEMENTAL FIGURE LEGENDS:**

**Supplemental Figure 1:** Western blots used to generate the densitometry values depicted in Figure 3.

**Supplemental Figure 2:** Western blots used to generate the densitometry values depicted in figure 6.

**Supplemental Figure 3:** Densitometry measurements for the blots depicted in Figure 7. Bars depict the mean  $\pm$  SEM of measurements normalized to GAPDH. Data are expressed in arbitrary units. P values  $< 0.05$  using ANOVA and the Newman-Keuls post-test were considered significant. n = 3-4/group.

**Supplemental Figure 4:** Transmission electron micrographs of left ventricle (LV) from wild-type and cardiac-specific overexpression of HO-1 (cs-HO-1) mice treat with vehicle or 14 or 60 days after treatment with doxorubicin. Micrographs were captured at 1650x total magnification. Scale bar represents 2  $\mu\text{m}$ . n = 3 – 5 mice per group, with at least 5 images evaluated per mouse. Images were assessed by a reviewer blinded to the different groups.

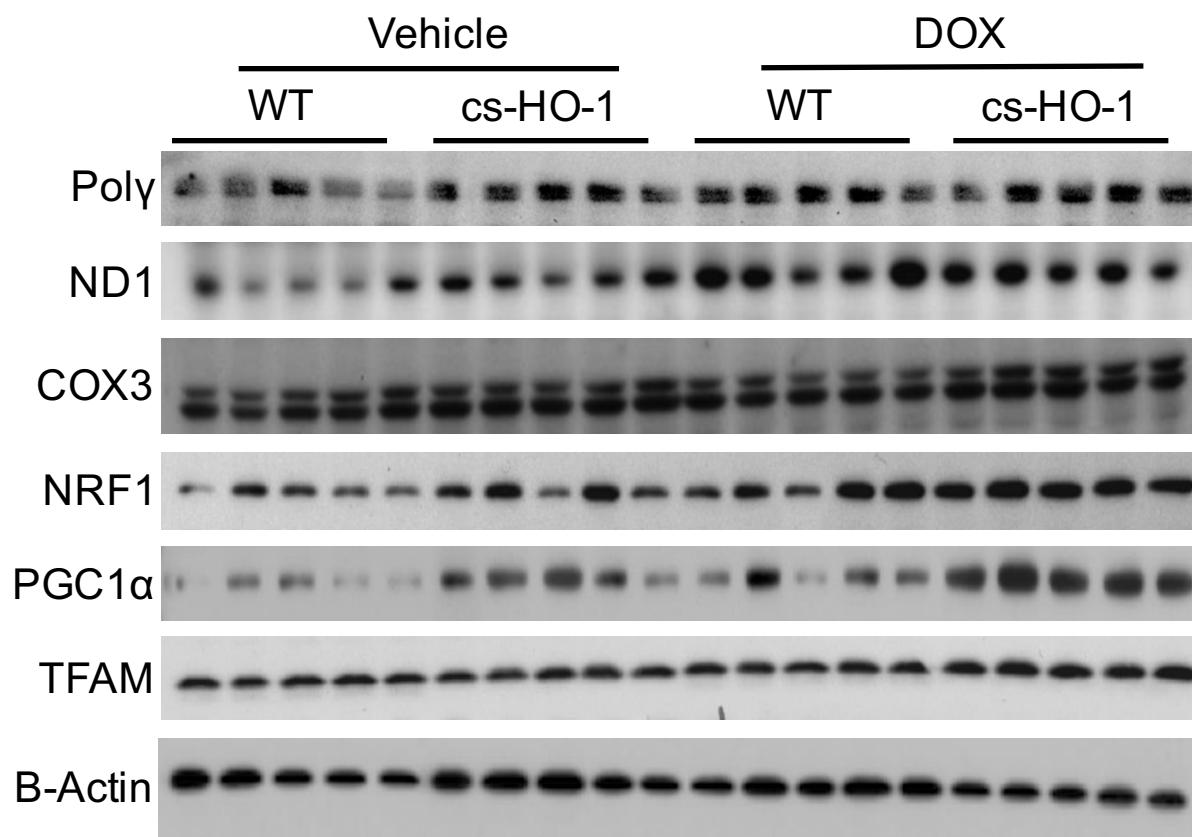

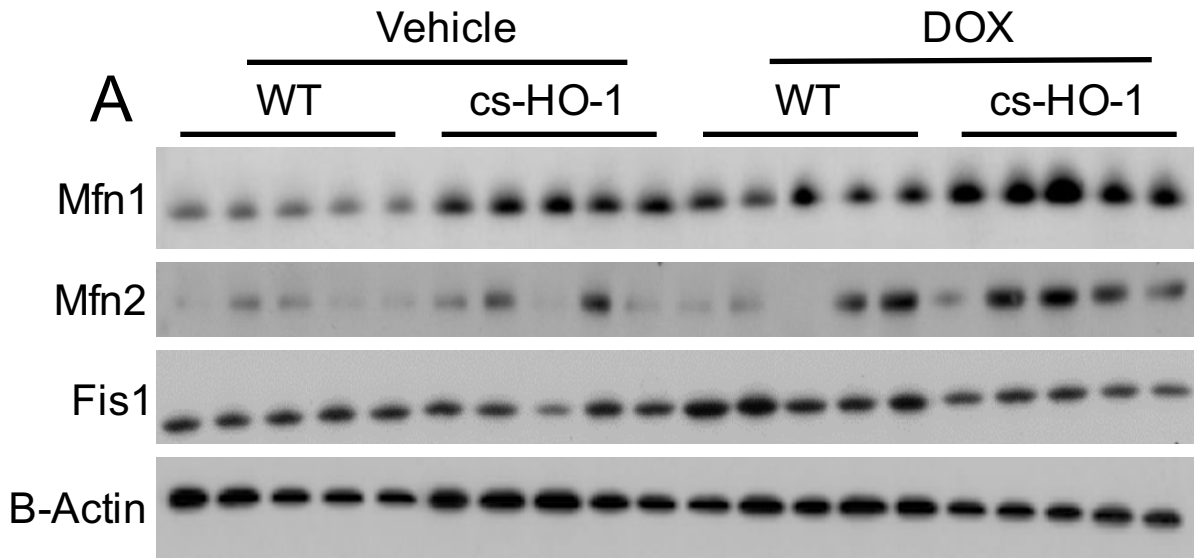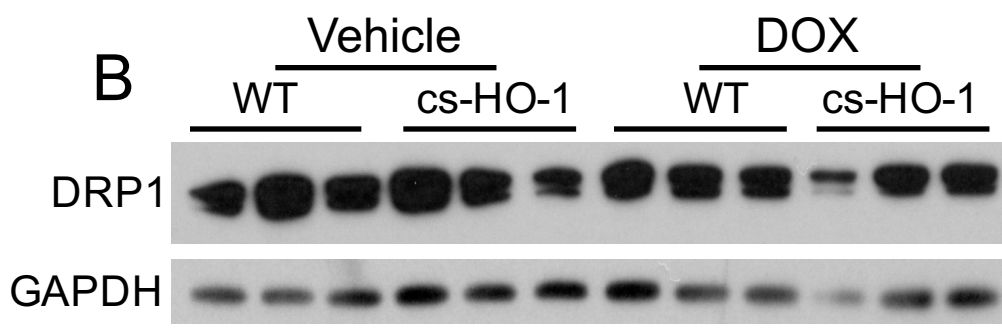

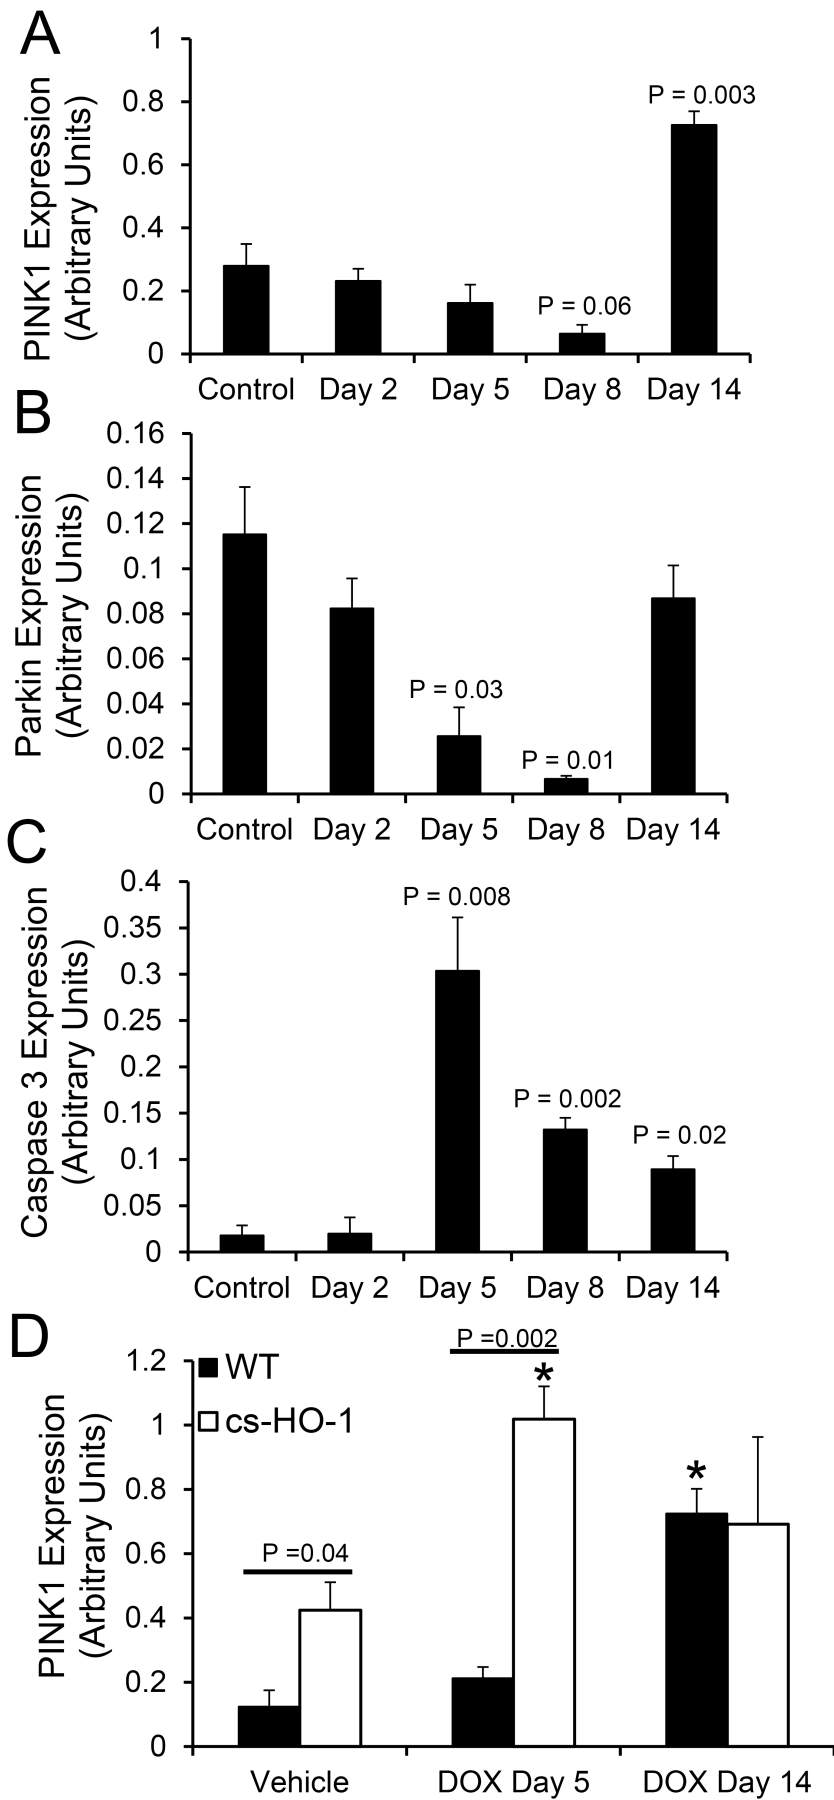

Wild-Type

cs-HO-1

Vehicle

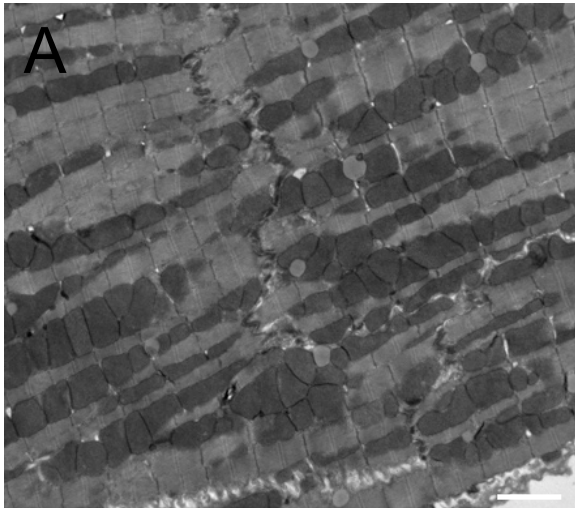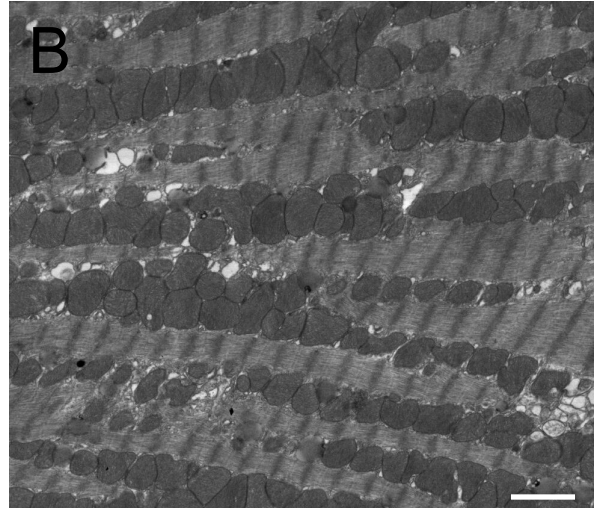

Day 14

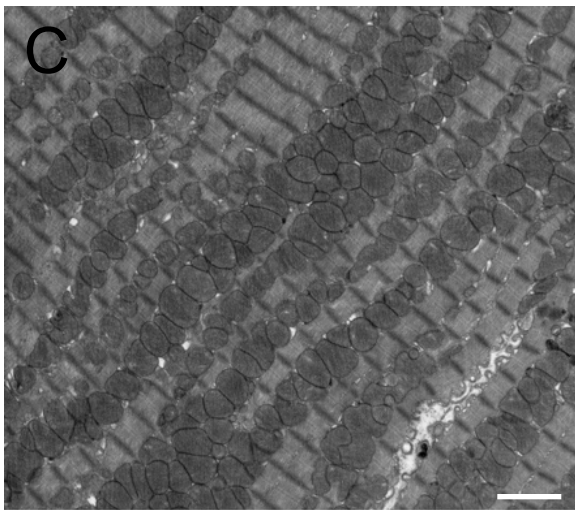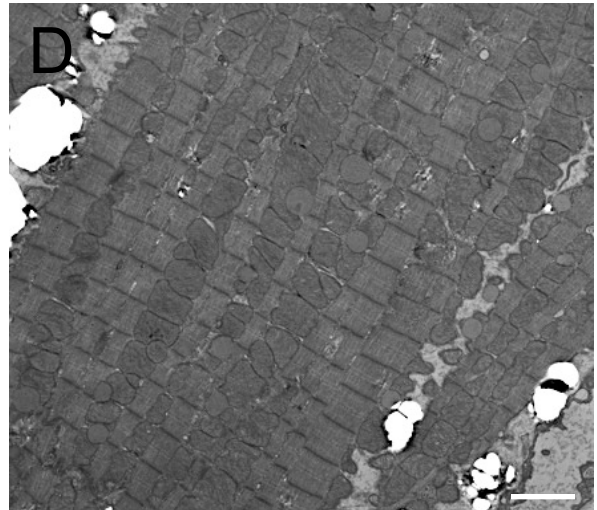

Day 60

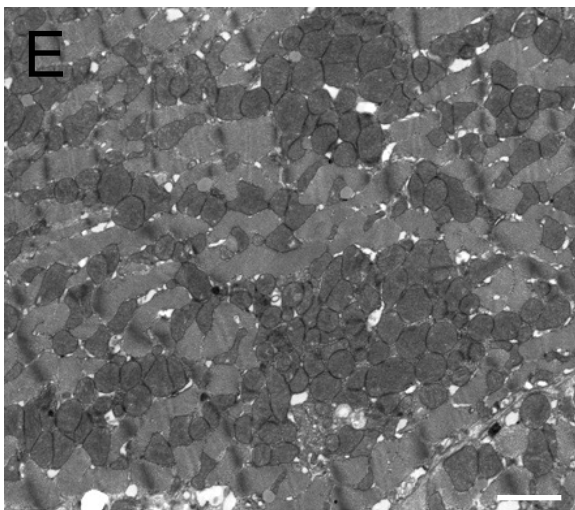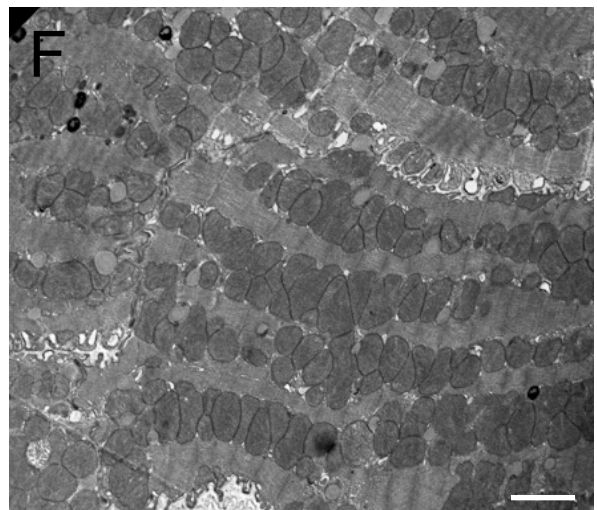

Full uncropped gel for Figure 7

Cropped Figure 7

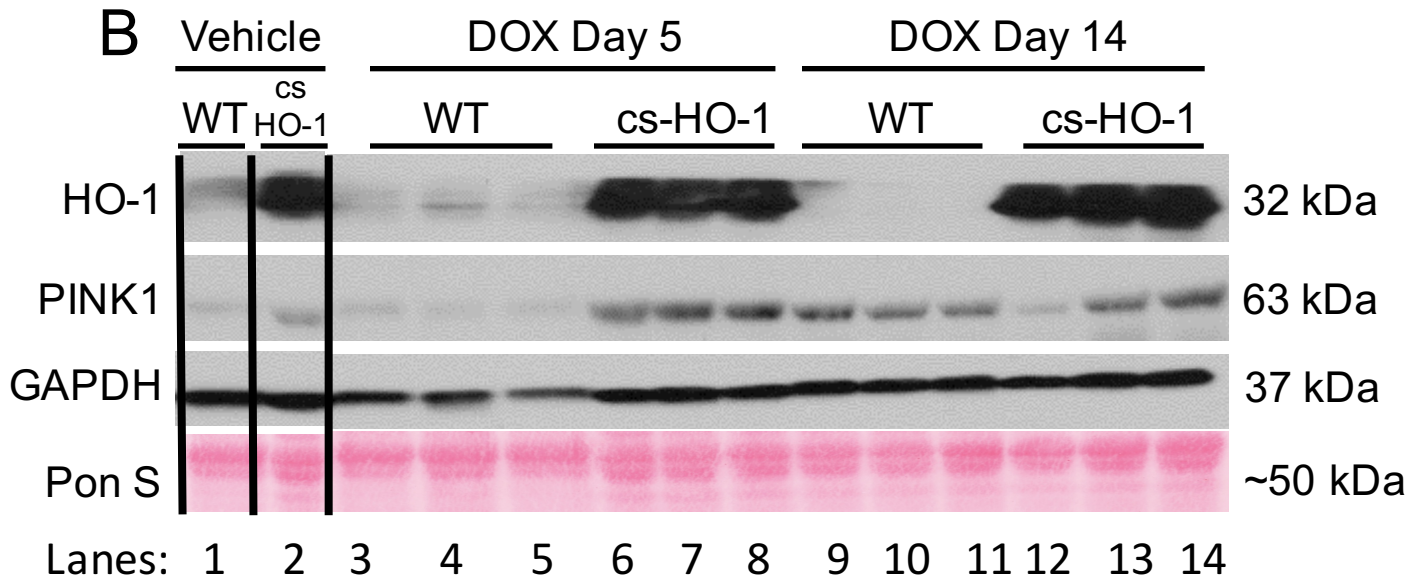

Figure 7 Original Blot – no lanes cropped

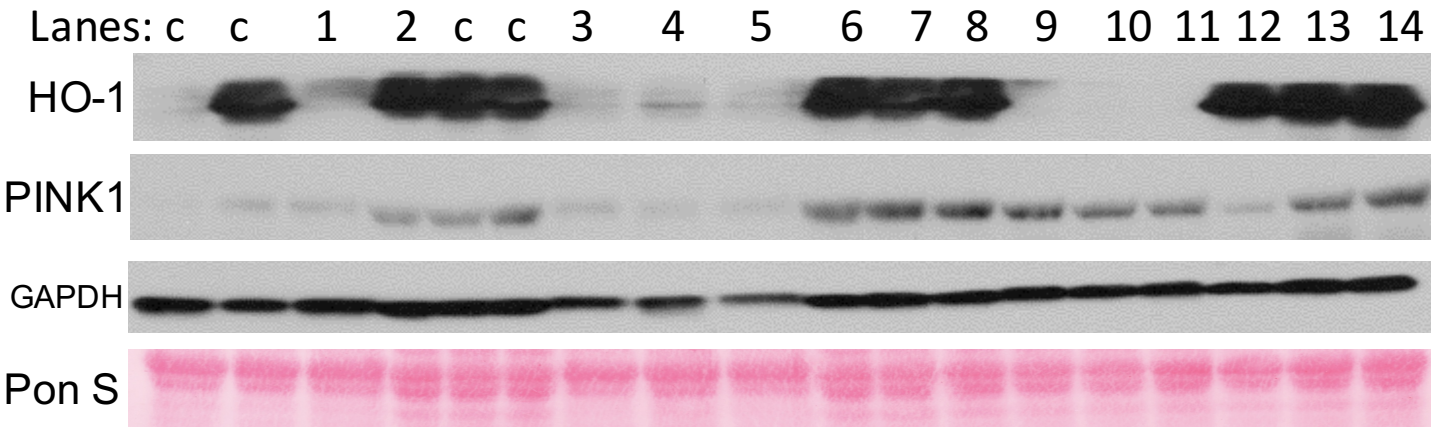

c = lanes cropped from the image of the blot in figure 7.

Numbered lanes were incorporated into figure 7.

The 4<sup>th</sup>, and 5<sup>th</sup> cropped lanes were superfluous, depicting results from cs-HO-1 mice already shown in lane 2. The 2<sup>nd</sup> cropped lane was the incorrect genotype. The 1<sup>st</sup> cropped lane was superfluous, showing the same control as lane 1.
